# Supplementary material
Source: PubMed Central journal article supplement (PMC3247941)
Supplement: supp_M111.297002_jbc.M111.297002-4.pdf [file supp_M111.297002_jbc.M111.297002-4.pdf]

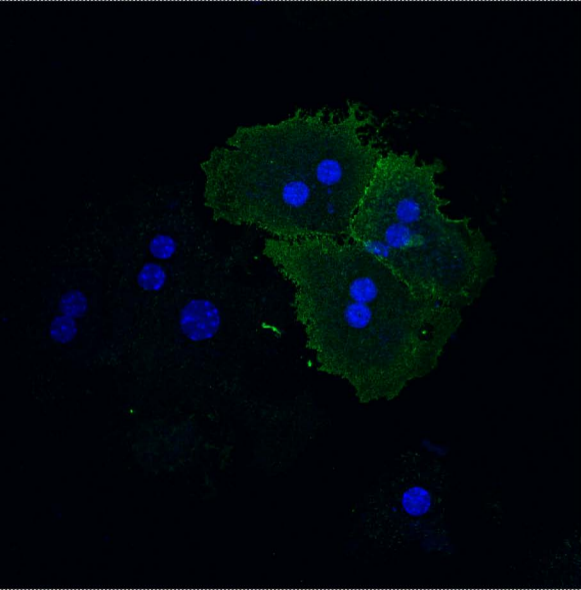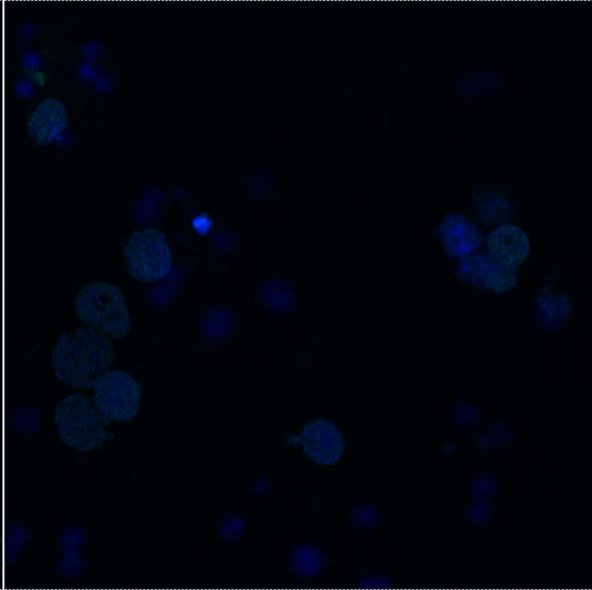

## **Supplementary Figure 1**

### **AQP9 immunolabeling in cultured primary hepatocytes:**

AQP9 immunolabeling was detected at the cell periphery in cultured primary hepatocytes isolated from AQP9<sup>+/+</sup> mice (left, green). No immunolabeling was observed in cells isolated from AQP9<sup>-/-</sup> mice (right). Nuclear stain, blue.
